# Supplementary material for: Modern Diets and the Health of Our Planet: An Investigation into the Environmental Impacts of Food Choices
Source: MDPI journal article supplement (doi:10.3390/nu15030692), 2023-01-30
Supplement: s1 [file s1]

# Supplementary Material: Modern Diets and the Health of Our Planet: An Investigation into the Environmental Impact of Food Choices

## Full Detail Meal Scenarios, Nutrition Totals, and Carbon Footprint Totals

### Table of Contents

- S1: Standard American
- S2: Mediterranean
- S3: Vegan
- S4: Paleo
- S5: Keto
- S6: Climatarian

### Notes

- Nutrition category percentages and totals may not exactly add up to 100% or total estimate due to rounding.
- “CHO” column totals include both fiber and carbohydrates.

### Legend

\*Avocado is from Central America carbon footprint estimate.

† Carbon Footprint Calculation for Airly Crackers:  $-21 \text{ g CO}_2 / 213 \text{ g box} = -2.85915 \text{ g CO}_2 / 29 \text{ g serving}$

\*\*Items purchased from local farmer’s market

**Table S1.1.1.** Standard American Higher Impact Meal Scenario Meal Plan Overview

| Meal [3,4]       | Food Item                                 | Quantity           | Kcal | CHO  | FAT  | PRO  | FIBER | Food Item from Database: Petersson [1], Song [2] | CF (kg CO2eq/kg food) | Food Weight (g) | Carbon Footprint (kg CO2eq) |
|------------------|-------------------------------------------|--------------------|------|------|------|------|-------|--------------------------------------------------|-----------------------|-----------------|-----------------------------|
| <b>Breakfast</b> | Yogurt - vanilla low fat - Greek (Dannon) | 1 container - 6 oz | 140  | 18   | 4    | 14   | 0     | Yogurt White [1]                                 | 1.5                   | 170.1           | 0.26                        |
|                  | Whole wheat toast                         | 1 slice            | 85   | 5    | 1    | 4    | 3     | Bread [2]                                        | 1                     | 30              | 0.03                        |
|                  | Butter                                    | 1 tbsp             | 102  | 0    | 12   | 0.12 | 0     | Butter [1]                                       | 7.3                   | 14.1            | 0.10                        |
|                  | Banana                                    | 1 medium           | 105  | 26.9 | 0.4  | 1.29 | 3.07  | Fruits [2]                                       | 1                     | 118             | 0.12                        |
| <b>Snack</b>     | Cheddar cheese                            | 2 slice            | 140  | 0.4  | 7.4  | 4    | 0     | Cheddar [1]                                      | 11.207                | 42              | 0.47                        |
|                  | Whole wheat crackers - Triscuit           | 6 crackers         | 120  | 20   | 3.5  | 3    | 3     | Bakery products (sweet and salty)                | 2                     | 28              | 0.06                        |
|                  |                                           |                    |      |      |      |      |       |                                                  |                       |                 |                             |
| <b>Lunch</b>     | Leafy salad greens                        | 2 cups             | 20   | 3    | 0.26 | 1    | 1.8   | Spinaches [2]                                    | 0.2                   | 100             | 0.02                        |
|                  | Tomato                                    | 1 medium           | 22   | 4    | 0.4  | 0.7  | 2     | Tomato [1]                                       | 0.475                 | 70              | 0.03                        |
|                  | Chopped onions                            | 50 g               | 22   | 5    | 0    | 0.5  | 2     | Onion [2]                                        | 0.5                   | 50              | 0.03                        |
|                  | Turkey                                    | 4 slices           | 84   | 0    | 3.5  | 12   | 0     | Turkey bone free meat [1]                        | 2.807                 | 168             | 0.47                        |
|                  | Salad dressing - Italian (Ken's Steak     | 1 tbsp             | 75   | 0    | 8.5  | 0    | 0     | Sauces, seasonings, and condiments [2]           | 4                     | 15.5            | 0.06                        |

|               |                        |          |     |    |    |      |     |                                  |        |       |      |
|---------------|------------------------|----------|-----|----|----|------|-----|----------------------------------|--------|-------|------|
|               | House)                 |          |     |    |    |      |     |                                  |        |       |      |
|               | Whole wheat bread      | 1 slice  | 85  | 5  | 1  | 4    | 3   | Bread [2]                        | 1      | 30    | 0.03 |
|               |                        |          |     |    |    |      |     |                                  |        |       |      |
| <b>Snack</b>  | Apple                  | 1        | 62  | 18 | 0  | 0.2  | 6   | Apple [1]                        | 0.358  | 154   | 0.06 |
|               | Peanut butter          | 1 tbsp   | 100 | 4  | 8  | 4    | 1.3 | Peanut butter & peanut paste [1] | 1.75   | 15    | 0.03 |
|               |                        |          |     |    |    |      |     |                                  |        |       |      |
| <b>Dinner</b> | Lean beef              | 8 oz     | 440 | 0  | 18 | 65   | 0   | Beef Bone Free Meat [1]          | 26.821 | 226.8 | 6.08 |
|               | Baked potato with skin | 1 medium | 161 | 41 | 0  | 5    | 3.8 | Potato [1]                       | 0.32   | 173   | 0.06 |
|               | Asparagus              | 0.5 cup  | 28  | 8  | 0  | 2    | 3   | Asparagus [1]                    | 0.915  | 44    | 0.04 |
|               | Butter                 | 2 tbsp   | 204 | 0  | 24 | 0.24 | 0   | Butter [1]                       | 7.3    | 28.2  | 0.21 |

**Table S1.1.2.** Standard American Higher Impact Meal Scenario Nutrition Overview

| Nutrition [3] | Kcal | CHO    | FAT    | PRO    | FIBER (CHO) |
|---------------|------|--------|--------|--------|-------------|
| <b>Totals</b> | 1995 | 158.3  | 91.96  | 121.05 | 31.97       |
| Calories      |      | 633.2  | 827.64 | 484.2  | 127.88      |
| Percentages   |      | 31.74% | 41.49% | 24.27% | 6.41%       |

**Table S1.1.3.** Standard American Higher Impact Meal Scenario Carbon Footprint Totals

| Carbon Footprint | Kg CO <sub>2</sub> eq |
|------------------|-----------------------|
| Breakfast        | 0.51                  |

|              |             |
|--------------|-------------|
| Lunch        | 0.64        |
| Snacks       | 0.61        |
| Dinner       | 6.38        |
| <b>Total</b> | <b>8.14</b> |

**Table S1.2.1.** Standard American Lower Impact Meal Scenario Meal Plan Overview

| Meal [3,4]       | Food Item                                 | Quantity           | Kcal | CHO  | FAT  | PRO  | FIBER | Food Item from Database: Petersson [1], Song [2] | CF (kg CO2eq/kg food) | Food Weight (g) | Carbon Footprint (kg CO2eq) |
|------------------|-------------------------------------------|--------------------|------|------|------|------|-------|--------------------------------------------------|-----------------------|-----------------|-----------------------------|
| <b>Breakfast</b> | Yogurt - vanilla low fat - Greek (Dannon) | 1 container - 6 oz | 140  | 18   | 4    | 14   | 0     | Yogurt White [1]                                 | 1.5                   | 170.1           | 0.26                        |
|                  | Whole wheat toast                         | 1 slice            | 85   | 5    | 1    | 4    | 3     | Bread [2]                                        | 1                     | 30              | 0.03                        |
|                  | Butter                                    | 1 tbsp             | 102  | 0    | 12   | 0.12 | 0     | Butter [1]                                       | 7.3                   | 14.1            | 0.10                        |
|                  | Banana                                    | 1 medium           | 105  | 26.9 | 0.4  | 1.29 | 3.07  | Fruits [2]                                       | 1                     | 118             | 0.12                        |
|                  |                                           |                    |      |      |      |      |       |                                                  |                       |                 |                             |
| <b>Snack</b>     | Cheddar cheese                            | 2 slice            | 140  | 0.8  | 14.8 | 8    | 0     | Cheddar [1]                                      | 11.207                | 42              | 0.47                        |
|                  | Whole wheat crackers - Triscuit           | 6 crackers         | 120  | 20   | 3.5  | 3    | 3     | Bakery products (sweet and salty)                | 2                     | 28              | 0.06                        |
|                  |                                           |                    |      |      |      |      |       |                                                  |                       |                 |                             |
| <b>Lunch</b>     | Leafy salad greens                        | 2 cups             | 20   | 3    | 0.26 | 1    | 1.8   | Spinaches [2]                                    | 0.2                   | 100             | 0.02                        |

|               |                                             |          |     |    |      |      |     |                                        |       |      |      |
|---------------|---------------------------------------------|----------|-----|----|------|------|-----|----------------------------------------|-------|------|------|
|               | Tomato                                      | 1 medium | 22  | 4  | 0.4  | 0.7  | 2   | Tomato [1]                             | 0.475 | 70   | 0.03 |
|               | Chopped onions                              | 50 g     | 22  | 5  | 0    | 0.5  | 2   | Onion [2]                              | 0.5   | 50   | 0.03 |
|               | Turkey                                      | 4 slices | 84  | 0  | 3.5  | 12   | 0   | Turkey bone free meat [1]              | 2.807 | 168  | 0.47 |
|               | Salad dressing - Italian (Ken's Stakehouse) | 1 tbsp   | 75  | 0  | 8.5  | 0    | 0   | Sauces, seasonings, and condiments [2] | 4     | 15.5 | 0.06 |
|               | Whole wheat bread                           | 1 slice  | 85  | 5  | 1    | 4    | 3   | Bread [2]                              | 1     | 30   | 0.03 |
|               |                                             |          |     |    |      |      |     |                                        |       |      |      |
| <b>Snack</b>  | Apple                                       | 1 medium | 62  | 18 | 0    | 0.2  | 6   | Apple [1]                              | 0.358 | 154  | 0.06 |
|               | Peanut butter                               | 1 tbsp   | 100 | 4  | 8    | 4    | 1.3 | Peanut butter & peanut paste [1]       | 1.75  | 15   | 0.03 |
|               |                                             |          |     |    |      |      |     |                                        |       |      |      |
| <b>Dinner</b> | Chicken breast barbequed with skin          | 1 breast | 275 | 0  | 13.7 | 108  | 0   | Chicken Bone Free Meat [1]             | 3.277 | 174  | 0.57 |
|               | Baked potato with skin                      | 1 medium | 161 | 41 | 0    | 5    | 3.8 | Potato [1]                             | 0.32  | 173  | 0.06 |
|               | Asparagus                                   | 0.5 cup  | 28  | 8  | 0    | 2    | 3   | Asparagus [1]                          | 0.915 | 44   | 0.04 |
|               | Butter                                      | 2 tbsp   | 204 | 0  | 24   | 0.24 | 0   | Butter [1]                             | 7.3   | 28.2 | 0.21 |

**Table S1.2.2.** Standard American Lower Impact Meal Scenario Nutrition Overview

| <b>Nutrition [3]</b> | <b>Kcal</b> | <b>CHO</b> | <b>FAT</b> | <b>PRO</b> | <b>FIBER (CHO)</b> |
|----------------------|-------------|------------|------------|------------|--------------------|
| <b>Totals</b>        | 1830        | 158.7      | 95.06      | 168.05     | 31.97              |



|               |                                 |            |     |     |      |      |     |                                    |       |     |      |
|---------------|---------------------------------|------------|-----|-----|------|------|-----|------------------------------------|-------|-----|------|
| <b>Snack</b>  | Walnuts                         | 2 oz       | 327 | 7   | 32   | 7.5  | 3.4 | Walnut [1]                         | 1.48  | 56  | 0.08 |
|               | Whole wheat crackers - Triscuit | 6 crackers | 120 | 20  | 3.5  | 3    | 3   | Bakery products [2]                | 2     | 28  | 0.06 |
|               | Mozzarella cheese               | 1 oz       | 90  | 0   | 7    | 7    | 0   | Mozzarella [1]                     | 7.79  | 28  | 0.22 |
|               |                                 |            |     |     |      |      |     |                                    |       |     |      |
| <b>Lunch</b>  | Whole Wheat bread               | 2 slices   | 200 | 32  | 4    | 8    | 4   | Wheat Grains [1]                   | 0.56  | 70  | 0.04 |
|               | Turkey breast lunch meat        | 2 oz       | 60  | 1   | 2    | 8    | 0   | Turkey Bone Free Meat [1]          | 3.83  | 57  | 0.22 |
|               | Mayonnaise                      | 1 tbsp     | 90  | 0   | 10   | 0    | 0   | Sauces, Seasonings, Condiments [2] | 4     | 14  | 0.06 |
|               | Spinach                         | 2 cups     | 17  | 1.6 | 0    | 1.7  | 1   | Spinaches [2]                      | 0.2   | 60  | 0.01 |
|               | Tomato                          | 1 medium   | 22  | 4   | 0.4  | 0.7  | 2   | Tomato [1]                         | 0.47  | 70  | 0.03 |
|               | Cucumber                        | 1/4 cup    | 6   | 1.5 | 0    | 0    | 0.2 | Cucumber [2]                       | 3     | 40  | 0.12 |
|               | Olive oil                       | 1 tbsp     | 64  | 11  | 5    | 0    | 0   | Olive Oil [2]                      | 2     | 13  | 0.03 |
|               |                                 |            |     |     |      |      |     |                                    |       |     |      |
| <b>Snack</b>  | Carrot sticks                   | 1 cup      | 50  | 12  | 0    | 1    | 3   | Carrot [2]                         | 0.3   | 100 | 0.03 |
|               | Apple                           | 1 apple    | 95  | 25  | 0    | 4    | 4   | Apple [1]                          | 0.36  | 182 | 0.07 |
|               | Peanut butter                   | 1 tbsp     | 100 | 4   | 8    | 4    | 1.3 | Peanut Butter [1]                  | 1.15  | 15  | 0.02 |
|               |                                 |            |     |     |      |      |     |                                    |       |     |      |
| <b>Dinner</b> | Salmon                          | 4.2 oz     | 281 | 0   | 12.6 | 39.2 | 0   | Salmon [1]                         | 3.47  | 85  | 0.29 |
|               | Whole wheat pasta               | 1/2 cup    | 92  | 19  | 0    | 3.4  | 3.5 | Pasta [1]                          | 1.656 | 50  | 0.08 |
|               | Spring mix                      | 1 cup      | 20  | 10  | 0    | 0    | 2.5 | Lettuce [1]                        | 0.33  | 50  | 0.02 |

|  |           |         |      |     |   |      |      |               |     |    |      |
|--|-----------|---------|------|-----|---|------|------|---------------|-----|----|------|
|  | Cucumber  | 1/4 cup | 6    | 1.5 | 0 | 0    | 0.2  | Cucumber [2]  | 3   | 40 | 0.12 |
|  | Carrots   | 1/4 cup | 12.5 | 3   | 0 | 0.25 | 0.75 | Carrot [2]    | 0.3 | 40 | 0.01 |
|  | Olive oil | 1 tbsp  | 64   | 11  | 5 | 0    | 0    | Olive oil [2] | 2   | 13 | 0.03 |
|  | Broccoli  | 1 cup   | 25   | 6   | 0 | 2    | 3    | Broccoli [1]  | 0.5 | 71 | 0.04 |

**Table S2.2.** Mediterranean Nutrition Overview

| Nutrition [3] | Kcal | CHO    | FAT   | PRO | FIBER(CHO) |
|---------------|------|--------|-------|-----|------------|
| Totals        | 2036 | 190.54 | 94.5  | 117 | 32         |
| Calories      |      | 762.16 | 850.5 | 467 | 7          |
| Percentages   |      | 37%    | 42%   | 23% | 17%        |

**Table S2.3.** Mediterranean Carbon Footprint Totals

| Carbon Footprint | Kg CO <sub>2</sub> eq |
|------------------|-----------------------|
| Breakfast        | 0.61                  |
| Lunch            | 0.47                  |
| Snacks           | 0.50                  |
| Dinner           | 0.59                  |
| <b>Total</b>     | <b>2.13</b>           |

**Table S3.1.** Vegan Meal Plan Overview



| Meal<br>[3,6]    | Food Item                                               | Quantity    | Kcal | CHO  | FAT  | PRO | FIBER | Food Item from<br>Database:<br>Petersson [1],<br>Song [2] | CF (kg<br>CO2eq/kg<br>food) | Food<br>Weight<br>(g) | Carbon<br>Footprint (kg<br>CO2eq) |
|------------------|---------------------------------------------------------|-------------|------|------|------|-----|-------|-----------------------------------------------------------|-----------------------------|-----------------------|-----------------------------------|
| <b>Breakfast</b> | Avocado                                                 | 1<br>medium | 233  | 12   | 22   | 2   | 10    | *Avocado [1]                                              | 1.38                        | 150                   | 0.21                              |
|                  | Pinto beans - canned,<br>drained                        | 1/2 cup     | 110  | 21   | 1.25 | 7   | 5     | Bean (pinto dried)<br>[1]                                 | 0.73                        | 130                   | 0.09                              |
|                  | Olive oil                                               | 1 tbsp      | 120  | 0    | 13.5 | 0   | 0     | Olive oil [2]                                             | 2                           | 13.3                  | 0.03                              |
|                  | Whole grain bread                                       | 1 slice     | 85   | 5    | 1    | 4   | 3     | Bread [2]                                                 | 1                           | 30                    | 0.03                              |
|                  | Tomato                                                  | 1<br>medium | 22   | 4.78 | 0.25 | 1   | 1.48  | Tomato [1]                                                | 0.48                        | 70                    | 0.03                              |
|                  |                                                         |             |      |      |      |     |       |                                                           |                             |                       |                                   |
| <b>Snack</b>     | Hummus - Sabra<br>Classic                               | 2 tbsp      | 70   | 4    | 5    | 2   | 1     | Sauces, seasonings<br>and condiments<br>[2]               | 4                           | 28                    | 0.11                              |
|                  | Carrots                                                 | 1/2 cup     | 26   | 6    | 0    | 0.6 | 2     | Carrots [2]                                               | 0.3                         | 120                   | 0.04                              |
|                  |                                                         |             |      |      |      |     |       |                                                           |                             |                       |                                   |
| <b>Lunch</b>     | Spinach                                                 | 1 cup       | 35   | 4.42 | 1.5  | 3   | 4.1   | Spinaches [2]                                             | 0.2                         | 100                   | 0.02                              |
|                  | Strawberries                                            | 1 cup       | 48.6 | 11.7 | 0.4  | 1   | 3.04  | Strawberry [1]                                            | 0.43                        | 152                   | 0.0                               |
|                  | Onions                                                  | 50 g        | 22   | 5    | 0    | 0.5 | 2     | Onion [2]                                                 | 0.5                         | 50                    | 0.025                             |
|                  | Almonds, roasted                                        | 1/2 cup     | 320  | 12   | 20   | 12  | 6     | Almond [1]                                                | 2.25                        | 60                    | 0.1347                            |
|                  | Salad dressing -<br>strawberry<br>vinaigrette - Hanleys | 2 tbsp      | 30   | 5    | 0.5  | 0   | 0     | Sauces,<br>seasonings, and<br>condiments [2]              | 4                           | 32                    | 0.128                             |

|               |                     |         |       |       |      |       |      |                                        |       |     |          |
|---------------|---------------------|---------|-------|-------|------|-------|------|----------------------------------------|-------|-----|----------|
|               |                     |         |       |       |      |       |      |                                        |       |     |          |
| <b>Snack</b>  | Apple               | 1       | 31    | 9     | 0    | 0.1   | 3    | Apple [1]                              | 0.36  | 77  | 0.027566 |
|               | Peanut butter       | 1 tbsp  | 94    | 3.5   | 8    | 3.7   | 1.3  | Peanut Butter & Peanut Paste [1]       | 1.75  | 15  | 0.02625  |
|               |                     |         |       |       |      |       |      |                                        |       |     |          |
| <b>Dinner</b> | Tofu, 1 firm        | 150g    | 127.5 | 1.5   | 6.3  | 16.35 | 1.35 | Tofu [1]                               | 1.072 | 150 | 0.1608   |
|               | Spinach             | 2 cups  | 126   | 24.6  | 2.66 | 19    | 15   | Spinaches [2]                          | 0.2   | 250 | 0.05     |
|               | White rice          | 3/4 cup | 539   | 119.7 | 1.95 | 10.42 | 0.75 | Rice [1]                               | 2.63  | 150 | 0.3945   |
|               | Soy sauce- Kikkoman | 1 tbsp  | 10    | 1     | 0    | 2     | 0    | Sauces, seasonings, and condiments [2] | 4     | 15  | 0.06     |

**Table S3.2.** Vegan Nutrition Overview

| <b>Nutrition [3]</b> | <b>Kcal</b> | <b>CHO</b> | <b>FAT</b> | <b>PRO</b> | <b>FIBER (CHO)</b> |
|----------------------|-------------|------------|------------|------------|--------------------|
| <b>Totals</b>        | 1983.1      | 250.2      | 82.32      | 84.67      | 59.02              |
| Calories             |             | 1000.8     | 740.88     | 338.68     | 236.08             |
| Percentages          |             | 48.84%     | 37.36%     | 17.08%     | 11.90%             |

**Table S3.3.** Vegan Carbon Footprint Totals

| <b>Carbon Footprint</b> | <b>Kg CO<sub>2</sub>eq</b> |
|-------------------------|----------------------------|
| Breakfast               | 0.39                       |
| Lunch                   | 0.37                       |
| Snacks                  | 0.20                       |
| Dinner                  | 0.67                       |

|              |             |
|--------------|-------------|
| <b>Total</b> | <b>1.63</b> |
|--------------|-------------|

**Table S4.1.1.** Paleo Higher Impact Meat Scenario Meal Plan Overview

| <b>Meal [3,7-8]</b> | <b>Food Item</b>                 | <b>Quantity</b> | <b>Kcal</b> | <b>CHO</b> | <b>FAT</b> | <b>PRO</b> | <b>FIBER</b> | <b>Food Item from Database: Petersson [1], Song [2]</b> | <b>CF (kg CO2eq/kg food)</b> | <b>Food Weight (g)</b> | <b>Carbon Footprint (kg CO2eq)</b> |
|---------------------|----------------------------------|-----------------|-------------|------------|------------|------------|--------------|---------------------------------------------------------|------------------------------|------------------------|------------------------------------|
| <b>Breakfast</b>    | Sweet potatoes - baked w/ skin   | 2               | 180         | 34.8       | 0.3        | 4          | 6.6          | Potato [1]                                              | 0.32                         | 226                    | 0.07                               |
|                     | Eggs                             | 4               | 286         | 2          | 19         | 25         | 0            | Eggs [1]                                                | 4.46                         | 240                    | 1.0                                |
|                     | Prosciutto - Applegate           | 2 slices        | 120         | 0          | 7          | 14         | 0            | Pork Bone Free Meat [1]                                 | 6.104                        | 56                     | 0.34                               |
|                     | Olive oil                        | 2 tsp           | 80          | 0          | 4.5        | 0          | 0            | Olive Oil [2]                                           | 2                            | 4.44                   | 0.009                              |
|                     |                                  |                 |             |            |            |            |              |                                                         |                              |                        |                                    |
| <b>Snack</b>        | Almonds                          | 1/4 cup         | 225         | 5.48       | 18.02      | 6.88       | 3.7          | Almond [1]                                              | 2.61                         | 30                     | 0.08                               |
|                     |                                  |                 |             |            |            |            |              |                                                         |                              |                        |                                    |
| <b>Lunch</b>        | Leafy salad greens               | 1 cup           | 10          | 2          | 0.13       | 0.5        | 1            | Spinaches [2]                                           | 0.2                          | 50                     | 0.01                               |
|                     | New York strip steak (grass fed) | 115 g           | 145         | 0          | 5.32       | 22.7       | 0            | Beef Bone Free Meat [1]                                 | 26.821                       | 115                    | 3.08                               |
|                     | Avocado                          | 1 medium        | 233         | 12         | 22         | 2          | 10           | *Avocado [1]                                            | 1.38                         | 150                    | 0.21                               |

|               |                              |             |     |      |      |      |     |                                           |       |         |       |
|---------------|------------------------------|-------------|-----|------|------|------|-----|-------------------------------------------|-------|---------|-------|
|               | Chimichurri sauce            | 28 g        | 44  | 2    | 3.5  | 0    | 0   | Sauces, seasonings,<br>and condiments [2] | 4     | 28      | 0.11  |
|               |                              |             |     |      |      |      |     |                                           |       |         |       |
| <b>Snack</b>  | Sliced apple                 | 1<br>medium | 96  | 18   | 0.25 | 0.2  | 4   | Apple [1]                                 | 0.358 | 154     | 0.06  |
|               | Unsweetened almond<br>butter | 2 tbsp      | 100 | 6.04 | 17   | 6    | 3.3 | Almond Paste [1]                          | 2.98  | 30      | 0.09  |
|               |                              |             |     |      |      |      |     |                                           |       |         |       |
| <b>Dinner</b> | Roasted snapper fish         | 1 filet     | 218 | 0    | 2.92 | 44.7 | 0   | Salmon [1]                                | 3.465 | 170     | 0.59  |
|               | Sauteed kale greens          | 1/2 cup     | 80  | 10   | 1    | 4    | 4   | Spinaches [2]                             | 0.2   | 226.796 | 0.045 |
|               | Olive oil                    | 2 tbsp      | 240 | 0    | 13.5 | 0    | 0   | Olive oil [2]                             | 2     | 26.6    | 0.05  |
|               | Garlic                       | 2 cloves    | 10  | 0.8  | 0    | 0.4  | 0.1 | Garlic [2]                                | 0.5   | 10      | 0.005 |
|               | Cauliflower rice             | 85 g        | 20  | 4    | 0    | 2    | 2   | Cauliflower [2]                           | 1     | 85      | 0.085 |

**Table S4.1.2.** Paleo Higher Impact Meat Scenario Nutrition Overview

| Nutrition [3] | Kcal | CHO    | FAT    | PRO    | FIBER (CHO) |
|---------------|------|--------|--------|--------|-------------|
| <b>Totals</b> | 2087 | 97.12  | 114.45 | 132.28 | 34.7        |
| Calories      |      | 388.46 | 1030   | 529.5  | 138.8       |
| Percentages   |      | 18.61% | 49.35% | 25.37% | 6.65%       |

**Table S4.1.2.** Paleo Higher Impact Meat Scenario Carbon Footprint Totals

| Carbon Footprint | Kg CO2eq |
|------------------|----------|
| Breakfast        | 1.49     |
| Lunch            | 3.41     |

|              |             |
|--------------|-------------|
| Snacks       | 0.22        |
| Dinner       | 0.78        |
| <b>Total</b> | <b>5.91</b> |

**Table S4.2.1.** Paleo Lower Impact Meat Scenario Meal Plan Overview

| Meal [3,7-8]     | Food Item                                     | Quantity   | Kcal  | CHO  | FAT   | PRO  | FIBER | Food Item from Database: Petersson [1], Song [2] | CF (kg CO2eq/kg food) | Food Weight (g) | Carbon Footprint (kg CO2eq) |
|------------------|-----------------------------------------------|------------|-------|------|-------|------|-------|--------------------------------------------------|-----------------------|-----------------|-----------------------------|
| <b>Breakfast</b> | Sweet potatoes - baked w/ skin                | 2          | 180   | 34.8 | 0.3   | 4    | 6.6   | Potato [1]                                       | 0.32                  | 226             | 0.07                        |
|                  | Eggs                                          | 4          | 286   | 2    | 19    | 25   | 0     | Eggs [1]                                         | 4.46                  | 240             | 1.07                        |
|                  | Prosciutto - Applegate                        | 2 slices   | 120   | 0    | 7     | 14   | 0     | Pork Bone Free Meat [1]                          | 6.104                 | 56              | 0.34                        |
|                  | Olive oil                                     | 2 tsp      | 80    | 0    | 4.5   | 0    | 0     | Olive Oil [2]                                    | 2                     | 4.44            | 0.009                       |
|                  |                                               |            |       |      |       |      |       |                                                  |                       |                 |                             |
| <b>Snack</b>     | Almonds                                       | 1/4 cup    | 225   | 5.48 | 18.02 | 6.88 | 3.7   | Almond [1]                                       | 2.61                  | 30              | 0.08                        |
|                  |                                               |            |       |      |       |      |       |                                                  |                       |                 |                             |
| <b>Lunch</b>     | Leafy salad greens                            | 1 cup      | 10    | 2    | 0.13  | 0.5  | 1     | Spinaches [2]                                    | 0.2                   | 50              | 0.01                        |
|                  | Chicken breast - free range w/ skin barbequed | 1/2 breast | 137.5 | 0    | 13.7  | 108  | 0     | Chicken Bone Free Meat [1]                       | 3.277                 | 87              | 0.29                        |
|                  | Avocado                                       | 1          | 233   | 12   | 22    | 2    | 10    | *Avocado [1]                                     | 1.38                  | 150             | 0.21                        |

|               |                              |             |     |      |      |      |     |                                           |       |         |       |
|---------------|------------------------------|-------------|-----|------|------|------|-----|-------------------------------------------|-------|---------|-------|
|               |                              | medium      |     |      |      |      |     |                                           |       |         |       |
|               | Chimichurri sauce            | 28 g        | 44  | 2    | 3.5  | 0    | 0   | Sauces, seasonings,<br>and condiments [2] | 4     | 28      | 0.11  |
|               |                              |             |     |      |      |      |     |                                           |       |         |       |
| <b>Snack</b>  | Sliced apple                 | 1<br>medium | 96  | 18   | 0.25 | 0.2  | 4   | Apple [1]                                 | 0.358 | 154     | 0.055 |
|               | Unsweetened almond<br>butter | 2 tbsp      | 100 | 6.04 | 17   | 6    | 3.3 | Almond Paste [1]                          | 2.98  | 30      | 0.09  |
|               |                              |             |     |      |      |      |     |                                           |       |         |       |
| <b>Dinner</b> | Roasted snapper fish         | 1 filet     | 218 | 0    | 2.92 | 44.7 | 0   | Salmon [1]                                | 3.465 | 170     | 0.59  |
|               | Sauteed kale greens          | 1/2 cup     | 80  | 10   | 1    | 4    | 4   | Spinaches [2]                             | 0.2   | 226.796 | 0.045 |
|               | Olive oil                    | 2 tbsp      | 240 | 0    | 13.5 | 0    | 0   | Olive oil [2]                             | 2     | 26.6    | 0.05  |
|               | Garlic - 2 cloves            | 2 cloves    | 10  | 0.8  | 0    | 0.4  | 0.1 | Garlic [2]                                | 0.5   | 10      | 0.005 |
|               | Cauliflower rice             | 85 g        | 20  | 4    | 0    | 2    | 2   | Cauliflower [2]                           | 1     | 85      | 0.085 |

**Table S4.2.2.** Paleo Lower Impact Meat Scenario Nutrition Overview

| <b>Nutrition [3]</b> | <b>Kcal</b> | <b>CHO</b> | <b>FAT</b> | <b>PRO</b> | <b>FIBER (CHO)</b> |
|----------------------|-------------|------------|------------|------------|--------------------|
| <b>Totals</b>        | 2079.5      | 97.12      | 122.83     | 217.68     | 34.7               |
| Calories             |             | 388.46     | 1105.43    | 870.7      | 138.8              |
| Percentages          |             | 18.68      | 53.16%     | 41.87%     | 6.67%              |

**Table S4.2.3.** Paleo Lower Impact Meat Scenario Carbon Footprint Totals

| <b>Carbon Footprint</b> | <b>Kg CO2eq</b> |
|-------------------------|-----------------|
| Breakfast               | 1.49            |

|              |             |
|--------------|-------------|
| Lunch        | 0.61        |
| Snacks       | 0.22        |
| Dinner       | 0.78        |
| <b>Total</b> | <b>3.11</b> |

**Table S5.1.1.** Keto Higher Impact Meat Scenario Meal Plan Overview

| Meal [3,9]       | Item                            | Quantity   | Kcal | CHO  | FAT | PRO  | FIBER | Food Item from Database: Petersson [1], Song [2] | CF (kg CO2eq/kg food) | Food Weight (g) | Carbon Footprint (kg CO2eq) |
|------------------|---------------------------------|------------|------|------|-----|------|-------|--------------------------------------------------|-----------------------|-----------------|-----------------------------|
| <b>Breakfast</b> | Breakfast sausage - Farmer John | 3 links    | 210  | 0    | 18  | 9    | 0     | Sausages [2]                                     | 10                    | 65              | 0.65                        |
|                  | Scrambled eggs                  | 2 eggs     | 148  | 1    | 10  | 12   | 0     | Eggs [1]                                         | 4.46                  | 100             | 0.45                        |
|                  | Butter                          | 1 tbsp     | 102  | 0    | 12  | 0.12 | 0     | Butter [1]                                       | 7.3                   | 14.1            | 0.10                        |
|                  | Cheddar cheese                  | 1 slice    | 70   | 0.4  | 7.4 | 4    | 0     | Cheddar [1]                                      | 11.207                | 21              | 0.235                       |
|                  | Bell pepper                     | 1/4 pepper | 6    | 1.25 | 0   | 0.2  | 0.2   | Pepper [2]                                       | 3                     | 30              | 0.09                        |
|                  |                                 |            |      |      |     |      |       |                                                  |                       |                 |                             |
| <b>Snack</b>     | Bell pepper                     | 3/4 pepper | 16   | 3.75 | 0   | 0.6  | 0.6   | Pepper [2]                                       | 3                     | 90              | 0.27                        |
|                  | Ranch dressing - Hidden         | 2 tbsp     | 130  | 1    | 13  | 0    | 0     | Sauces,                                          | 4                     | 60              | 0.24                        |

|               |                         |          |      |     |      |     |     |                                          |        |       |       |
|---------------|-------------------------|----------|------|-----|------|-----|-----|------------------------------------------|--------|-------|-------|
|               | Valley Keto Friendly    |          |      |     |      |     |     | seasonings,<br>condiments [2]            |        |       |       |
|               |                         |          |      |     |      |     |     |                                          |        |       |       |
| <b>Lunch</b>  | Leafy salad greens      | 1 cup    | 10   | 1.5 | 0.13 | 0.5 | 0.9 | Lettuce [1]                              | 0.325  | 50    | 0.016 |
|               | Tomato                  | 1 medium | 22   | 4   | 0.4  | 0.7 | 2   | Tomato [1]                               | 0.475  | 70    | 0.033 |
|               | Celery                  | 2 stalks | 22   | 5   | 0    | 0.5 | 2   | Celery [2]                               | 1      | 50    | 0.05  |
|               | Tuna packed in water    | 4 oz     | 85   | 0   | 3.5  | 12  | 0   | Fish [2]                                 | 4      | 113   | 0.45  |
|               | Avocado                 | 1        | 227  | 12  | 22   | 2   | 10  | *Avocado [1]                             | 1.38   | 150   | 0.21  |
|               | Mayonnaise - Best Foods | 2 tbsp   | 200  | 0   | 11   | 0   | 0   | Sauces,<br>seasonings,<br>condiments [2] | 4      | 60    | 0.24  |
|               |                         |          |      |     |      |     |     |                                          |        |       |       |
| <b>Snack</b>  | Celery                  | 1 stalk  | 62   | 18  | 0    | 0.2 | 6   | Celery [2]                               | 1      | 25    | 0.025 |
|               | Cream cheese            | 2 tbsp   | 70   | 1.2 | 6.8  | 1.2 | 0   | (Fresh Cheese)<br>Cream [1]              | 2.17   | 10    | 0.02  |
|               |                         |          |      |     |      |     |     |                                          |        |       |       |
| <b>Dinner</b> | Lean beef               | 8 oz     | 448  | 0   | 18   | 65  | 0   | Beef bone free<br>meat [1]               | 26.821 | 226.8 | 6.08  |
|               | Cauliflower - steamed   | 1/2 head | 73.5 | 15  | 1    | 1   | 6   | Cauliflower [2]                          | 1      | 300   | 0.3   |
|               | Cheddar cheese          | 1 slice  | 70   | 0.4 | 7.4  | 4   | 0   | Cheddar [1]                              | 11.207 | 21    | 0.235 |
|               | Olive oil               | 1 tbsp   | 120  | 0   | 7    | 0   | 0   | Olive oil [2]                            | 2      | 13.3  | 0.027 |
|               | Spring mix              | 1 cup    | 20   | 10  | 0    | 0   | 2.5 | Lettuce [1]                              | 0.325  | 50    | 0.016 |
|               | Cucumber                | 1/4 cup  | 6    | 1.5 | 0    | 0   | 0.2 | Cucumber [2]                             | 3      | 40    | 0.12  |



|  |           |         |      |    |   |      |      |               |     |    |        |
|--|-----------|---------|------|----|---|------|------|---------------|-----|----|--------|
|  | Carrots   | 1/4 cup | 12.5 | 3  | 0 | 0.25 | 0.75 | Carrot [2]    | 0.3 | 40 | 0.01   |
|  | Olive oil | 1 tbsp  | 64   | 11 | 5 | 0    | 0    | Olive oil [2] | 2   | 13 | 0.03   |
|  | Broccoli  | 1 cup   | 25   | 6  | 0 | 2    | 3    | Broccoli [1]  | 0.5 | 71 | 0.0355 |

**Table S5.1.2.** Keto Higher Impact Meat Scenario Nutrition Overview

| Nutrition [3] | Kcal | CHO    | FAT     | PRO    | FIBER(CHO) |
|---------------|------|--------|---------|--------|------------|
| <b>Totals</b> | 2092 | 64.5   | 137.63  | 113.02 | 27.7       |
| Calories      |      | 258    | 1238.67 | 452.08 | 110.8      |
| Percentages   |      | 12.34% | 59.22%  | 21.62% | 5.30%      |

**Table S5.1.3.** Keto Higher Impact Meat Scenario Carbon Footprint Totals

| Carbon Footprint | Kg CO <sub>2</sub> eq |
|------------------|-----------------------|
| Breakfast        | 1.52                  |
| Lunch            | 1.00                  |
| Snacks           | 0.98                  |
| Dinner           | 6.64                  |
| <b>Total</b>     | <b>9.72</b>           |

**Table S5.2.1.** Keto Lower Impact Meat Scenario Meal Plan Overview

| Meal [3,9] | Item | Quantity | Kcal | CHO | FAT | PRO | FIBER | Food Item from Database: Petersson [1], | CF (kg CO <sub>2</sub> eq/kg food) | Food Weight (g) | Carbon Footprint (kg) |
|------------|------|----------|------|-----|-----|-----|-------|-----------------------------------------|------------------------------------|-----------------|-----------------------|
|------------|------|----------|------|-----|-----|-----|-------|-----------------------------------------|------------------------------------|-----------------|-----------------------|



|               |                       |          |      |     |     |      |   |                             |        |      |       |
|---------------|-----------------------|----------|------|-----|-----|------|---|-----------------------------|--------|------|-------|
| <b>Snack</b>  | Celery                | 1 stalk  | 11   | 2.5 | 0   | 0.25 | 1 | Celery [2]                  | 1      | 25   | 0.025 |
|               | Cream cheese          | 2 tbsp   | 70   | 1.2 | 6.8 | 1.2  | 0 | (Fresh Cheese)<br>Cream [1] | 2.17   | 10   | 0.022 |
|               |                       |          |      |     |     |      |   |                             |        |      |       |
| <b>Dinner</b> | Pork chop             | 8 oz     | 374  | 0   | 21  | 65   | 0 | Pork Meat [1]               | 4.9705 | 227  | 1.13  |
|               | Cauliflower - steamed | 1/2 head | 73.5 | 15  | 1   | 1    | 6 | Cauliflower [2]             | 1      | 300  | 0.3   |
|               | Cheddar cheese        | 1 slice  | 70   | 0.4 | 7.4 | 4    | 0 | Cheddar [1]                 | 11.207 | 21   | 0.235 |
|               | Butter                | 1 tbsp   | 102  | 0   | 12  | 0.12 | 0 | Butter [1]                  | 7.3    | 14.1 | 0.10  |

**Table S5.2.2.** Keto Lower Impact Meat Scenario Nutrition Overview

| Nutrition [3] | Kcal | CHO   | FAT     | PRO    | FIBER(CHO) |
|---------------|------|-------|---------|--------|------------|
| <b>Totals</b> | 1949 | 49    | 145.63  | 113.19 | 22.7       |
| Calories      |      | 196   | 1310.67 | 452.76 | 90.8       |
| Percentages   |      | 6.90% | 67.27%  | 23.24% | 4.66%      |

**Table S5.2.3.** Keto Lower Impact Meat Scenario Carbon Footprint Totals

| Carbon Footprint | Kg CO <sub>2</sub> eq |
|------------------|-----------------------|
| Breakfast        | 1.52                  |
| Lunch            | 1.00                  |
| Snacks           | 0.98                  |
| Dinner           | 1.77                  |
| <b>Total</b>     | <b>4.85</b>           |

**Table S6.1.1.** Climatarian Meat (Higher Impact) Scenario Meal Plan Overview

| Meal [3,10]      | Item                             | Quantity  | Kcal | CHO  | FAT  | PRO  | FIBER | Food Item from Database: Petersson [1], Song [2] | CF (kg CO2eq/kg food) | Food Weight (g) | Carbon Footprint (kg CO2eq) |
|------------------|----------------------------------|-----------|------|------|------|------|-------|--------------------------------------------------|-----------------------|-----------------|-----------------------------|
| <b>Breakfast</b> | *Eggs                            | 2         | 233  | 12   | 22   | 2    | 10    | Eggs [1]                                         | 4.46                  | 100             | 0.45                        |
|                  | *Green onion                     | 1/2 cup   | 11   | 2    | 0    | 0.34 | 0.6   | Onion [2]                                        | 0.5                   | 26              | 0.01                        |
|                  | Olive Oil - in-state made        | 1 tbsp    | 120  | 0    | 13.5 | 0    | 0     | Olive oil [2]                                    | 2                     | 13              | 0.03                        |
|                  | Whole wheat bread - local bakery | 1 slice   | 85   | 5    | 1    | 4    | 3     | Bread [2]                                        | 1                     | 30              | 0.03                        |
|                  | *Tomato                          | 1 medium  | 22   | 4.78 | 0.25 | 1    | 1.48  | Tomato [1]                                       | 0.48                  | 70              | 0.03                        |
|                  | Butter - local dairy             | 1 tbsp    | 102  | 0    | 11.5 | 0.12 | 0     | Butter [1]                                       | 7.3                   | 14              | 0.10                        |
|                  |                                  |           |      |      |      |      |       |                                                  |                       |                 |                             |
| <b>Snack</b>     | Airly crackers - cheddar         | 1 serving | 130  | 17   | 6    | 3    | 1     | N/A                                              | ⊕see calc.            | 29              | -0.00285                    |
|                  | Hummus - locally made            | 3 tbsp    | 105  | 6    | 7.5  | 3    | 1.5   | Sauces, seasonings, condiments [2]               | 4                     | 42              | 0.17                        |
|                  |                                  |           |      |      |      |      |       |                                                  |                       |                 |                             |
| <b>Lunch</b>     | *Carrots                         | 1/2 cup   | 26   | 6    | 0    | 0.6  | 2     | Carrots [2]                                      | 0.3                   | 120             | 0.04                        |
|                  | Albacore canned tuna (local      | 1 pouch   | 120  | 0    | 4    | 21   | 0     | Fish [2]                                         | 4                     | 160             | 0.64                        |

|               |                                            |            |      |      |      |      |      |                                          |      |     |       |
|---------------|--------------------------------------------|------------|------|------|------|------|------|------------------------------------------|------|-----|-------|
|               | pacific tuna)                              |            |      |      |      |      |      |                                          |      |     |       |
|               | Mayonnaise - locally made                  | 1 tbsp     | 100  | 0    | 11   | 0    | 0    | Sauces,<br>seasonings,<br>condiments [2] | 4    | 30  | 0.12  |
|               | Whole wheat bread - local bakery           | 2 slices   | 170  | 10   | 2    | 8    | 6    | Bread [2]                                | 1    | 60  | 0.06  |
|               | *Romaine lettuce                           | 1/4 bunch  | 5    | 1    | 0    | 0.4  | 0.5  | Lettuce [1]                              | 0.33 | 25  | 0.008 |
|               |                                            |            |      |      |      |      |      |                                          |      |     |       |
| <b>Snack</b>  | *Apple - locally grown - Fall season       | 1 medium   | 104  | 27.6 | 0.28 | 0.58 | 2.81 | Apple [1]                                | 0.36 | 154 | 0.06  |
|               | Peanut butter - ground in store            | 1 tbsp     | 94   | 3.5  | 8    | 3.7  | 1.3  | Peanut butter,<br>Peanut paste [1]       | 1.75 | 15  | 0.03  |
|               |                                            |            |      |      |      |      |      |                                          |      |     |       |
| <b>Dinner</b> | Chicken breast - local free range, organic | 0.5 breast | 150  | 0    | 8.05 | 18.1 | 0    | Chicken bone free<br>meat [1]            | 3.07 | 75  | 0.23  |
|               | *Spinach                                   | 2 bunches  | 17   | 1.6  | 0    | 1.7  | 1    | Spinaches [2]                            | 0.2  | 60  | 0.01  |
|               | Olive Oil - in-state made                  | 2 tbsp     | 240  | 0    | 27   | 0    | 0    | Olive oil [2]                            | 2    | 26  | 0.05  |
|               | *Zucchini                                  | 1 medium   | 33   | 6    | 0    | 2.4  | 2    | Vegetables [2]                           | 1    | 200 | 0.2   |
|               | Brown rice - locally grown                 | 1/2 cup    | 124  | 26   | 1    | 2.25 | 1.6  | Rice [1]                                 | 2.63 | 88  | 0.23  |
|               | Cucumber                                   | 1/4 cup    | 6    | 1.5  | 0    | 0    | 0.2  | Cucumber [2]                             | 3    | 40  | 0.12  |
|               | Carrots                                    | 1/4 cup    | 12.5 | 3    | 0    | 0.25 | 0.75 | Carrot [2]                               | 0.3  | 40  | 0.01  |
|               | Olive oil                                  | 1 tbsp     | 64   | 11   | 5    | 0    | 0    | Olive oil [2]                            | 2    | 13  | 0.03  |
|               | Broccoli                                   | 1 cup      | 25   | 6    | 0    | 2    | 3    | Broccoli [1]                             | 0.5  | 71  | 0.04  |

**Table S6.1.2.** Climatarian Meat (Higher Impact) Scenario Nutrition Overview

| Nutrition [3] | Kcal | CHO    | FAT     | PRO    | FIBER(CHO) |
|---------------|------|--------|---------|--------|------------|
| Totals        | 1991 | 128.48 | 123.08  | 72.19  | 34.79      |
| Calories      |      | 513.92 | 1107.72 | 288.76 | 139.16     |
| Percentages   |      | 25.81% | 55.64%  | 14.50% | 6.99%      |

**Table S6.1.3.** Climatarian Meat (Higher Impact) Scenario Carbon Footprint Totals

| Carbon Footprint | Kg CO <sub>2</sub> eq |
|------------------|-----------------------|
| Breakfast        | 0.65                  |
| Lunch            | 0.86                  |
| Snacks           | 0.30                  |
| Dinner           | 0.73                  |
| Total            | 2.49                  |

**Table S6.2.1.** Climatarian Vegetarian (Lower Impact) Scenario Meal Plan Overview

| Meal [3,10] | Item                      | Quantity | Kcal | CHO | FAT  | PRO  | FIBER | Food Item from Database: Petersson [1], Song [2] | CF (kg CO <sub>2</sub> eq/kg food) | Food Weight (g) | Carbon Footprint (kg CO <sub>2</sub> eq) |
|-------------|---------------------------|----------|------|-----|------|------|-------|--------------------------------------------------|------------------------------------|-----------------|------------------------------------------|
| Breakfast   | **Eggs                    | 2        | 233  | 12  | 22   | 2    | 10    | Eggs [1]                                         | 4.46                               | 100             | 0.45                                     |
|             | **Green onion             | 1/2 cup  | 11   | 2   | 0    | 0.34 | 0.6   | Onion [2]                                        | 0.5                                | 26              | 0.01                                     |
|             | Olive oil - in-state made | 1 tbsp   | 120  | 0   | 13.5 | 0    | 0     | Olive oil [2]                                    | 2                                  | 13              | 0.03                                     |

|              |                                       |           |     |      |      |      |      |                                    |                        |     |          |
|--------------|---------------------------------------|-----------|-----|------|------|------|------|------------------------------------|------------------------|-----|----------|
|              | Whole wheat bread - local bakery      | 1 slice   | 85  | 5    | 1    | 4    | 3    | Bread [2]                          | 1                      | 30  | 0.03     |
|              | **Tomato                              | 1 medium  | 22  | 4.78 | 0.25 | 1    | 1.48 | Tomato [1]                         | 0.475                  | 70  | 0.03     |
|              | Butter - local dairy                  | 1 tbsp    | 102 | 0    | 11.5 | 0.12 | 0    | Butter [1]                         | 7.3                    | 14  | 0.10     |
|              |                                       |           |     |      |      |      |      |                                    |                        |     |          |
| <b>Snack</b> | Airly crackers - cheddar              | 1 serv    | 130 | 17   | 6    | 3    | 1    | N/A                                | <sup>⊕</sup> see calc. | 29  | -0.00285 |
|              | Hummus - locally made                 | 4 tbsp    | 140 | 8    | 10   | 4    | 2    | Sauces, seasonings, condiments [2] | 4                      | 56  | 0.22     |
|              |                                       |           |     |      |      |      |      |                                    |                        |     |          |
| <b>Lunch</b> | **Carrots                             | 1/2 cup   | 26  | 6    | 0    | 0.6  | 2    | Carrots [2]                        | 0.3                    | 120 | 0.04     |
|              | Black bean patty                      | 1 patty   | 110 | 13   | 4.5  | 9    | 4    | Bean (pinto dried) [1]             | 0.73                   | 130 | 0.09     |
|              | Mayonnaise - locally made             | 1 tbsp    | 100 | 0    | 11   | 0    | 0    | Sauces, seasonings, condiments [2] | 4                      | 30  | 0.12     |
|              | Whole wheat bread - local bakery      | 2 slices  | 170 | 10   | 2    | 8    | 6    | Bread [2]                          | 1                      | 60  | 0.06     |
|              | **Romaine lettuce                     | 1/4 bunch | 5   | 1    | 0    | 0.4  | 0.5  | Lettuce [1]                        | 0.325                  | 25  | 0.01     |
|              |                                       |           |     |      |      |      |      |                                    |                        |     |          |
| <b>Snack</b> | **Apple - locally grown - Fall season | 1 apple   | 104 | 27.6 | 0.28 | 0.58 | 2.81 | Apple [1]                          | 0.358                  | 154 | 0.06     |
|              | Peanut butter - ground in             | 1 tbsp    | 94  | 3.5  | 8    | 3.7  | 1.3  | Peanut butter,                     | 1.75                   | 15  | 0.03     |

|               |                                     |            |      |     |      |      |      |                  |       |     |      |
|---------------|-------------------------------------|------------|------|-----|------|------|------|------------------|-------|-----|------|
|               | store                               |            |      |     |      |      |      | Peanut paste [1] |       |     |      |
|               |                                     |            |      |     |      |      |      |                  |       |     |      |
| <b>Dinner</b> | Tofu - firm                         | 100g       | 85   | 1   | 4.19 | 10.9 | 0.9  | Tofu [1]         | 1.072 | 100 | 0.11 |
|               | **Spinach                           | 2 bunches  | 17   | 1.6 | 0    | 1.7  | 1    | Spinaches [2]    | 0.2   | 60  | 0.01 |
|               | Olive oil - in-state made           | 2 tbsp     | 240  | 0   | 13.5 | 0    | 0    | Olive oil [2]    | 2     | 26  | 0.05 |
|               | **Zucchini                          | 1 zucchini | 33   | 6   | 0    | 2.4  | 2    | Vegetables [2]   | 1     | 200 | 0.2  |
|               | Brown rice - locally grown, organic | 1/2 cup    | 124  | 26  | 1    | 2.25 | 1.6  | Rice [1]         | 2.63  | 88  | 0.23 |
|               | Cucumber                            | 1/4 cup    | 6    | 1.5 | 0    | 0    | 0.2  | Cucumber [2]     | 3     | 40  | 0.12 |
|               | Carrots                             | 1/4 cup    | 12.5 | 3   | 0    | 0.25 | 0.75 | Carrot [2]       | 0.3   | 40  | 0.01 |
|               | Olive oil                           | 1 tbsp     | 64   | 11  | 5    | 0    | 0    | Olive oil [2]    | 2     | 13  | 0.03 |
|               | Broccoli                            | 1 cup      | 25   | 6   | 0    | 2    | 3    | Broccoli [1]     | 0.5   | 71  | 0.04 |

**Table S6.2.2.** Climatarian Vegetarian (Lower Impact) Scenario Nutrition Overview

| <b>Nutrition [3]</b> | <b>Kcal</b> | <b>CHO</b> | <b>FAT</b> | <b>PRO</b> | <b>FIBER(CHO)</b> |
|----------------------|-------------|------------|------------|------------|-------------------|
| <b>Totals</b>        | 1951        | 144.48     | 108.72     | 53.99      | 40.19             |
| Calories             |             | 577.92     | 978.48     | 215.96     | 160.76            |
| Percentages          |             | 29.03%     | 49.15%     | 10.85%     | 8.07%             |

**Table S6.2.3.** Climatarian Vegetarian (Lower Impact) Scenario Carbon Footprint Totals

| <b>Carbon Footprint</b> | <b>Kg CO<sub>2</sub>eq</b> |
|-------------------------|----------------------------|
| Breakfast               | 0.65                       |
| Lunch                   | 0.32                       |



|              |             |
|--------------|-------------|
| Snacks       | 0.30        |
| Dinner       | 0.60        |
| <b>Total</b> | <b>1.87</b> |

## References:

1. Petersson, T.; Secondi, L.; Magnani, A. et al. A multilevel carbon and water footprint dataset of food commodities. *Sci Data* **2021**, *8*, 127. <https://doi.org/10.1038/s41597-021-00909-8>
2. Song, L.; Cai, H.; Zhu, T. Large-scale microanalysis of U.S. household food carbon footprints and reduction potentials. *Environmental Science & Technology* **2021**, *55*, 15323–15332. <https://doi.org/10.1021/acs.est.1c02658>
3. Food and Nutrition - U.S. Food and Drug Administration. Available online: <https://www.usda.gov/topics/food-and-nutrition> (accessed 11 October 2022).
4. MyPlate | U.S. Department of Agriculture. Available online: <https://www.myplate.gov/> (accessed on 13 October 2022).
5. Estruch, R.; Ros, E.; Salas-Salvadó, J.; Covas, M.-I.; Corella, D.; Arós, F.; Gómez-Gracia, E.; Ruiz-Gutiérrez, V.; Fiol, M.; Lapetra, J.; Lamuela-Raventos, R. M.; Serra-Majem, L.; Pintó, X.; Basora, J.; Muñoz, M. A.; Sorlí, J. V.; Martínez, J. A.; Fitó, M.; Gea, A.; Martínez-González, M. A. Primary Prevention of Cardiovascular Disease with a Mediterranean Diet Supplemented with Extra-Virgin Olive Oil or Nuts. *NEJM* **2018**, *378*, e34. <https://doi.org/10.1056/NEJMoa1800389>
6. Hever J. Plant-based diets: A physician's guide. *The Permanente journal* 2016, *20*, 15–082. <https://doi.org/10.7812/TPP/15-082>
7. Diet review: Paleo diet for weight loss. The Nutrition Source. Available online: <https://www.hsph.harvard.edu/nutritionsource/healthy-weight/diet-reviews/paleo-diet/> (accessed on 18 October 2022).
8. Jönsson, T.; Granfeldt, Y.; Åhrén, B.; Branell, U.; Pålsson, G.; Hansson, A.; Söderström, M.; Lindeberg, S. Beneficial effects of a Paleolithic diet on cardiovascular risk factors in type 2 diabetes: a randomized cross-over pilot study. *Cardiovasc Diabetol* 2009, *3*, 1229–1232. <https://doi.org/10.1186/1475-2840-8-35>
9. Neudorf, H.; Mindrum, M.; Mindrum, C.; Durrer, C.; Little, J.P. A low-carbohydrate, high-fat ketogenic diet program implemented by an interdisciplinary primary care team improves markers of cardiometabolic health in adults with type 2 diabetes: A retrospective secondary analysis. *Canadian Journal of Diabetes* 2021, *46*, 302–306. <https://doi.org/10.1016/j.jcjd.2021.09.001>
10. Climatarian – The easy, healthy, climate friendly diet. Available online: <https://climatarian.com/> (accessed on 26 October 2022).
